# Supplementary material for: Environmentally Realistic Waterborne Atrazine Exposure Affects Behavior in Poecilia latipinna
Source: MDPI journal article supplement (doi:10.3390/w15020306), 2023-01-11
Supplement: s1 [file s1]

## Raw data: Control (C) females from Expt. I

| Fish Test Group and # | Total Time Spent w/Female (s) | Total Time Spent w/Male (s) | Total Time on Left Side of Tank (s) | Total Time on Right Side of Tank (s) | total time in a pref zone |
|-----------------------|-------------------------------|-----------------------------|-------------------------------------|--------------------------------------|---------------------------|
| C1                    | 312                           | 628                         | 482                                 | 458                                  | 940                       |
| C1                    | 388                           | 544                         | 439                                 | 493                                  | 932                       |
| C3                    | 402                           | 488                         | 518                                 | 372                                  | 890                       |
| C4                    | 313                           | 503                         | 385                                 | 431                                  | 816                       |
| C5                    | 386                           | 444                         | 326                                 | 504                                  | 830                       |
| C6                    | 318                           | 400                         | 422                                 | 296                                  | 718                       |
| C7                    | 201                           | 518                         | 322                                 | 397                                  | 719                       |
| C8                    | 322                           | 511                         | 515                                 | 318                                  | 833                       |
| C9                    | 266                           | 488                         | 384                                 | 370                                  | 754                       |
| C10                   | 384                           | 484                         | 536                                 | 332                                  | 868                       |
| C11                   | 334                           | 507                         | 338                                 | 503                                  | 841                       |
| C12                   | 414                           | 501                         | 416                                 | 499                                  | 915                       |
| C13                   | 311                           | 536                         | 556                                 | 291                                  | 847                       |
| C14                   | 492                           | 488                         | 470                                 | 510                                  | 980                       |
| C15                   | 288                           | 515                         | 377                                 | 426                                  | 803                       |
| C16                   | 422                           | 398                         | 531                                 | 289                                  | 820                       |
| C17                   | 435                           | 510                         | 402                                 | 543                                  | 945                       |
| C18                   | 327                           | 487                         | 391                                 | 423                                  | 814                       |
| C19                   | 463                           | 287                         | 387                                 | 363                                  | 750                       |
| C20                   | 406                           | 399                         | 519                                 | 286                                  | 805                       |

| Fish Test Group and # | Total Time Spent w/Female (s) | Total Time Spent w/Male (s) | Diff Score control females |  | Total Time Spent w/Female (s) | Total Time Spent w/Male (s) | total time w/dummies control females |
|-----------------------|-------------------------------|-----------------------------|----------------------------|--|-------------------------------|-----------------------------|--------------------------------------|
| C1                    | 312                           | 628                         | -316                       |  | 312                           | 628                         | 940                                  |
| C1                    | 388                           | 544                         | -156                       |  | 388                           | 544                         | 932                                  |
| C3                    | 402                           | 488                         | -86                        |  | 402                           | 488                         | 890                                  |
| C4                    | 313                           | 503                         | -190                       |  | 313                           | 503                         | 816                                  |
| C5                    | 386                           | 444                         | -58                        |  | 386                           | 444                         | 830                                  |
| C6                    | 318                           | 400                         | -82                        |  | 318                           | 400                         | 718                                  |
| C7                    | 201                           | 518                         | -317                       |  | 201                           | 518                         | 719                                  |
| C8                    | 322                           | 511                         | -189                       |  | 322                           | 511                         | 833                                  |
| C9                    | 266                           | 488                         | -222                       |  | 266                           | 488                         | 754                                  |
| C10                   | 384                           | 484                         | -100                       |  | 384                           | 484                         | 868                                  |
| C11                   | 334                           | 507                         | -173                       |  | 334                           | 507                         | 841                                  |
| C12                   | 414                           | 501                         | -87                        |  | 414                           | 501                         | 915                                  |
| C13                   | 311                           | 536                         | -225                       |  | 311                           | 536                         | 847                                  |
| C14                   | 492                           | 488                         | 4                          |  | 492                           | 488                         | 980                                  |
| C15                   | 288                           | 515                         | -227                       |  | 288                           | 515                         | 803                                  |
| C16                   | 422                           | 398                         | 24                         |  | 422                           | 398                         | 820                                  |
| C17                   | 435                           | 510                         | -75                        |  | 435                           | 510                         | 945                                  |
| C18                   | 327                           | 487                         | -160                       |  | 327                           | 487                         | 814                                  |
| C19                   | 463                           | 287                         | 176                        |  | 463                           | 287                         | 750                                  |
| C20                   | 406                           | 399                         | 7                          |  | 406                           | 399                         | 805                                  |

## Raw data: High dose (HD) females from Expt. I

| Fish Test Group and # | Total Time Spent w/Female (s) | Total Time Spent w/Male (s) | Total Time on Left Side of Tank (s) | Total Time on Right Side of Tank (s) |
|-----------------------|-------------------------------|-----------------------------|-------------------------------------|--------------------------------------|
| HD1                   | 349                           | 460                         | 450                                 | 359                                  |
| HD2                   | 364                           | 377                         | 372                                 | 369                                  |
| HD3                   | 279                           | 438                         | 338                                 | 379                                  |
| HD4                   | 369                           | 349                         | 337                                 | 381                                  |
| HD5                   | 349                           | 427                         | 333                                 | 443                                  |
| HD6                   | 268                           | 360                         | 449                                 | 179                                  |
| HD7                   | 262                           | 231                         | 331                                 | 162                                  |
| HD8                   | 350                           | 360                         | 332                                 | 378                                  |
| HD9                   | 316                           | 263                         | 263                                 | 316                                  |
| HD10                  | 313                           | 437                         | 460                                 | 290                                  |
| HD11                  | 338                           | 394                         | 172                                 | 560                                  |
| HD12                  | 231                           | 363                         | 439                                 | 155                                  |
| HD13                  | 316                           | 331                         | 466                                 | 181                                  |
| HD14                  | 442                           | 398                         | 249                                 | 591                                  |
| HD15                  | 364                           | 261                         | 334                                 | 291                                  |
| HD16                  | 335                           | 366                         | 281                                 | 420                                  |
| HD17                  | 452                           | 260                         | 350                                 | 362                                  |
| HD18                  | 277                           | 349                         | 303                                 | 323                                  |
| HD19                  | 413                           | 313                         | 338                                 | 388                                  |
| HD20                  | 411                           | 359                         | 372                                 | 398                                  |

| Fish Test Group and # | Total Time Spent w/Female (s) | Total Time Spent w/Male (s) | Diff score HD females | Total Time Spent w/Female (s) | Total Time Spent w/Male (s) | total time w/ dummies HD females |
|-----------------------|-------------------------------|-----------------------------|-----------------------|-------------------------------|-----------------------------|----------------------------------|
| HD1                   | 349                           | 460                         | -111                  | 349                           | 460                         | 809                              |
| HD2                   | 364                           | 377                         | -13                   | 364                           | 377                         | 741                              |
| HD3                   | 279                           | 438                         | -159                  | 279                           | 438                         | 717                              |
| HD4                   | 369                           | 349                         | 20                    | 369                           | 349                         | 718                              |
| HD5                   | 349                           | 427                         | -78                   | 349                           | 427                         | 776                              |
| HD6                   | 268                           | 360                         | -92                   | 268                           | 360                         | 628                              |
| HD7                   | 262                           | 231                         | 31                    | 262                           | 231                         | 493                              |
| HD8                   | 350                           | 360                         | -10                   | 350                           | 360                         | 710                              |
| HD9                   | 316                           | 263                         | 53                    | 316                           | 263                         | 579                              |
| HD10                  | 313                           | 437                         | -124                  | 313                           | 437                         | 750                              |
| HD11                  | 338                           | 394                         | -56                   | 338                           | 394                         | 732                              |
| HD12                  | 231                           | 363                         | -132                  | 231                           | 363                         | 594                              |
| HD13                  | 316                           | 331                         | -15                   | 316                           | 331                         | 647                              |
| HD14                  | 442                           | 398                         | 44                    | 442                           | 398                         | 840                              |
| HD15                  | 364                           | 261                         | 103                   | 364                           | 261                         | 625                              |
| HD16                  | 335                           | 366                         | -31                   | 335                           | 366                         | 701                              |
| HD17                  | 452                           | 260                         | 192                   | 452                           | 260                         | 712                              |
| HD18                  | 277                           | 349                         | -72                   | 277                           | 349                         | 626                              |
| HD19                  | 413                           | 313                         | 100                   | 413                           | 313                         | 726                              |
| HD20                  | 411                           | 359                         | 52                    | 411                           | 359                         | 770                              |

## Raw data: Low dose (LD) females from Expt. I

| Fish Test Group and # | Total Time Spent w/Female (s) | Total Time Spent w/Male (s) | Total Time on Left Side of Tank (s) | Total Time on Right Side of Tank (s) |
|-----------------------|-------------------------------|-----------------------------|-------------------------------------|--------------------------------------|
| LD1                   | 512                           | 250                         | 422                                 | 340                                  |
| LD2                   | 437                           | 314                         | 344                                 | 407                                  |
| LD3                   | 401                           | 288                         | 411                                 | 278                                  |
| LD4                   | 427                           | 203                         | 311                                 | 319                                  |
| LD5                   | 311                           | 304                         | 263                                 | 352                                  |
| LD6                   | 321                           | 205                         | 299                                 | 227                                  |
| LD7                   | 381                           | 155                         | 255                                 | 281                                  |
| LD8                   | 418                           | 222                         | 402                                 | 238                                  |
| LD9                   | 292                           | 266                         | 234                                 | 324                                  |
| LD10                  | 422                           | 234                         | 400                                 | 256                                  |
| LD11                  | 417                           | 202                         | 288                                 | 331                                  |
| LD12                  | 418                           | 304                         | 313                                 | 409                                  |
| LD13                  | 401                           | 275                         | 422                                 | 253                                  |
| LD14                  | 388                           | 392                         | 408                                 | 372                                  |
| LD15                  | 315                           | 288                         | 284                                 | 319                                  |
| LD16                  | 375                           | 275                         | 451                                 | 199                                  |
| LD17                  | 410                           | 335                         | 300                                 | 445                                  |
| LD18                  | 312                           | 277                         | 251                                 | 338                                  |
| LD19                  | 122                           | 388                         | 233                                 | 277                                  |
| LD20                  | 294                           | 311                         | 318                                 | 287                                  |

| Fish Test Group and # | Total Time Spent w/Female (s) | Total Time Spent w/Male (s) | diff score LD females |  | Total Time Spent w/Female (s) | Total Time Spent w/Male (s) | total time w/ dummies LD females |
|-----------------------|-------------------------------|-----------------------------|-----------------------|--|-------------------------------|-----------------------------|----------------------------------|
| LD1                   | 512                           | 250                         | 262                   |  | 512                           | 250                         | 762                              |
| LD2                   | 437                           | 314                         | 123                   |  | 437                           | 314                         | 751                              |
| LD3                   | 401                           | 288                         | 113                   |  | 401                           | 288                         | 689                              |
| LD4                   | 427                           | 203                         | 224                   |  | 427                           | 203                         | 630                              |
| LD5                   | 311                           | 304                         | 7                     |  | 311                           | 304                         | 615                              |
| LD6                   | 321                           | 205                         | 116                   |  | 321                           | 205                         | 526                              |
| LD7                   | 381                           | 155                         | 226                   |  | 381                           | 155                         | 536                              |
| LD8                   | 418                           | 222                         | 196                   |  | 418                           | 222                         | 640                              |
| LD9                   | 292                           | 266                         | 26                    |  | 292                           | 266                         | 558                              |
| LD10                  | 422                           | 234                         | 188                   |  | 422                           | 234                         | 656                              |
| LD11                  | 417                           | 202                         | 215                   |  | 417                           | 202                         | 619                              |
| LD12                  | 418                           | 304                         | 114                   |  | 418                           | 304                         | 722                              |
| LD13                  | 401                           | 275                         | 126                   |  | 401                           | 275                         | 676                              |
| LD14                  | 388                           | 392                         | -4                    |  | 388                           | 392                         | 780                              |
| LD15                  | 315                           | 288                         | 27                    |  | 315                           | 288                         | 603                              |
| LD16                  | 375                           | 275                         | 100                   |  | 375                           | 275                         | 650                              |
| LD17                  | 410                           | 335                         | 75                    |  | 410                           | 335                         | 745                              |
| LD18                  | 312                           | 277                         | 35                    |  | 312                           | 277                         | 589                              |
| LD19                  | 122                           | 388                         | -266                  |  | 122                           | 388                         | 510                              |
| LD20                  | 294                           | 311                         | -17                   |  | 294                           | 311                         | 605                              |

## Raw data: Control (C) males from Expt. II

| Fish Test Group and # | Total Time Spent w/Female (s) | Total Time Spent w/Male (s) | total time in a pref zone |
|-----------------------|-------------------------------|-----------------------------|---------------------------|
| C1                    | 412                           | 418                         | 830                       |
| C1                    | 407                           | 324                         | 731                       |
| C3                    | 528                           | 361                         | 889                       |
| C4                    | 544                           | 287                         | 831                       |
| C5                    | 419                           | 402                         | 821                       |
| C6                    | 450                           | 312                         | 762                       |
| C7                    | 435                           | 325                         | 760                       |
| C8                    | 559                           | 322                         | 881                       |
| C9                    | 333                           | 429                         | 762                       |
| C10                   | 580                           | 304                         | 884                       |
| C11                   | 302                           | 517                         | 819                       |
| C12                   | 499                           | 428                         | 927                       |
| C13                   | 485                           | 377                         | 862                       |
| C14                   | 512                           | 334                         | 846                       |
| C15                   | 345                           | 425                         | 770                       |
| C16                   | 460                           | 390                         | 850                       |
| C17                   | 511                           | 422                         | 933                       |
| C18                   | 389                           | 401                         | 790                       |
| C19                   | 218                           | 588                         | 806                       |
| C20                   | 284                           | 511                         | 795                       |

| Fish Test Group and # | Total Time Spent w/Female (s) | Total Time Spent w/Male (s) | Diff score controls |
|-----------------------|-------------------------------|-----------------------------|---------------------|
| C1                    | 412                           | 418                         | -6                  |
| C1                    | 407                           | 324                         | 83                  |
| C3                    | 528                           | 361                         | 167                 |
| C4                    | 544                           | 287                         | 257                 |
| C5                    | 419                           | 402                         | 17                  |
| C6                    | 450                           | 312                         | 138                 |
| C7                    | 435                           | 325                         | 110                 |
| C8                    | 559                           | 322                         | 237                 |
| C9                    | 333                           | 429                         | -96                 |
| C10                   | 580                           | 304                         | 276                 |
| C11                   | 302                           | 517                         | -215                |
| C12                   | 499                           | 428                         | 71                  |
| C13                   | 485                           | 377                         | 108                 |
| C14                   | 512                           | 334                         | 178                 |
| C15                   | 345                           | 425                         | -80                 |
| C16                   | 460                           | 390                         | 70                  |
| C17                   | 511                           | 422                         | 89                  |
| C18                   | 389                           | 401                         | -12                 |
| C19                   | 218                           | 588                         | -370                |
| C20                   | 284                           | 511                         | -227                |

## Raw data: High dose (HD) males from Expt. II

| Fish Test Group and # | Total Time Spent w/Female (s) | Total Time Spent w/Male (s) | total time in a pref zone |
|-----------------------|-------------------------------|-----------------------------|---------------------------|
| HD1                   | 325                           | 289                         | 614                       |
| HD2                   | 388                           | 414                         | 802                       |
| HD3                   | 251                           | 212                         | 463                       |
| HD4                   | 388                           | 218                         | 606                       |
| HD5                   | 222                           | 344                         | 566                       |
| HD6                   | 191                           | 321                         | 512                       |
| HD7                   | 362                           | 244                         | 606                       |
| HD8                   | 299                           | 389                         | 688                       |
| HD9                   | 402                           | 221                         | 623                       |
| HD10                  | 388                           | 365                         | 753                       |
| HD11                  | 211                           | 313                         | 524                       |
| HD12                  | 318                           | 233                         | 551                       |
| HD13                  | 504                           | 301                         | 805                       |
| HD14                  | 188                           | 311                         | 499                       |
| HD15                  | 301                           | 234                         | 535                       |
| HD16                  | 111                           | 202                         | 313                       |
| HD17                  | 412                           | 305                         | 717                       |
| HD18                  | 84                            | 204                         | 288                       |
| HD19                  | 302                           | 255                         | 557                       |
| HD20                  | 315                           | 411                         | 726                       |

| Fish Test Group and # | Total Time Spent w/Female (s) | Total Time Spent w/Male (s) | Diff score HD |
|-----------------------|-------------------------------|-----------------------------|---------------|
| HD1                   | 325                           | 289                         | 36            |
| HD2                   | 388                           | 414                         | -26           |
| HD3                   | 251                           | 212                         | 39            |
| HD4                   | 388                           | 218                         | 170           |
| HD5                   | 222                           | 344                         | -122          |
| HD6                   | 191                           | 321                         | -130          |
| HD7                   | 362                           | 244                         | 118           |
| HD8                   | 299                           | 389                         | -90           |
| HD9                   | 402                           | 221                         | 181           |
| HD10                  | 388                           | 365                         | 23            |
| HD11                  | 211                           | 313                         | -102          |
| HD12                  | 318                           | 233                         | 85            |
| HD13                  | 504                           | 301                         | 203           |
| HD14                  | 188                           | 311                         | -123          |
| HD15                  | 301                           | 234                         | 67            |
| HD16                  | 111                           | 202                         | -91           |
| HD17                  | 412                           | 305                         | 107           |
| HD18                  | 84                            | 204                         | -120          |
| HD19                  | 302                           | 255                         | 47            |
| HD20                  | 315                           | 411                         | -96           |

## Raw data: Low dose (LD) males from Expt. II

| Fish Test Group and # | Total Time Spent w/Female (s) | Total Time Spent w/Male (s) | total time in a pref zone |
|-----------------------|-------------------------------|-----------------------------|---------------------------|
| LD1                   | 311                           | 228                         | 539                       |
| LD2                   | 327                           | 218                         | 545                       |
| LD3                   | 250                           | 199                         | 449                       |
| LD4                   | 312                           | 155                         | 467                       |
| LD5                   | 311                           | 301                         | 612                       |
| LD6                   | 288                           | 277                         | 565                       |
| LD7                   | 322                           | 205                         | 527                       |
| LD8                   | 412                           | 299                         | 711                       |
| LD9                   | 203                           | 331                         | 534                       |
| LD10                  | 322                           | 282                         | 604                       |
| LD11                  | 311                           | 215                         | 526                       |
| LD12                  | 300                           | 267                         | 567                       |
| LD13                  | 404                           | 275                         | 679                       |
| LD14                  | 288                           | 298                         | 586                       |
| LD15                  | 212                           | 288                         | 500                       |
| LD16                  | 175                           | 285                         | 460                       |
| LD17                  | 400                           | 365                         | 765                       |
| LD18                  | 202                           | 234                         | 436                       |
| LD19                  | 222                           | 388                         | 610                       |
| LD20                  | 315                           | 311                         | 626                       |

| Fish Test Group and # | Total Time Spent w/Female (s) | Total Time Spent w/Male (s) | Diff score LD |
|-----------------------|-------------------------------|-----------------------------|---------------|
| LD1                   | 311                           | 228                         | 83            |
| LD2                   | 327                           | 218                         | 109           |
| LD3                   | 250                           | 199                         | 51            |
| LD4                   | 312                           | 155                         | 157           |
| LD5                   | 311                           | 301                         | 10            |
| LD6                   | 288                           | 277                         | 11            |
| LD7                   | 322                           | 205                         | 117           |
| LD8                   | 412                           | 299                         | 113           |
| LD9                   | 203                           | 331                         | -128          |
| LD10                  | 322                           | 282                         | 40            |
| LD11                  | 311                           | 215                         | 96            |
| LD12                  | 300                           | 267                         | 33            |
| LD13                  | 404                           | 275                         | 129           |
| LD14                  | 288                           | 298                         | -10           |
| LD15                  | 212                           | 288                         | -76           |
| LD16                  | 175                           | 285                         | -110          |
| LD17                  | 400                           | 365                         | 35            |
| LD18                  | 202                           | 234                         | -32           |
| LD19                  | 222                           | 388                         | -166          |
| LD20                  | 315                           | 311                         | 4             |

## Raw data: Control (C) females from Expt. III

| subject # | SvL sm (s) | SvL mid (s) | SvL lrg (s) | SvL sm (s) | SvL mid (s) | SvL lrg (s) | lvL sm (s) | lvL mid (s) | lvL lrg (s) |
|-----------|------------|-------------|-------------|------------|-------------|-------------|------------|-------------|-------------|
| C1        | 85         | 171         | 344         | 101        | 308         | 191         | 116        | 213         | 271         |
| C2        | 154        | 108         | 338         | 213        | 185         | 262         | 216        | 186         | 198         |
| C3        | 89         | 173         | 338         | 183        | 189         | 228         | 109        | 219         | 272         |
| C4        | 171        | 264         | 165         | 156        | 275         | 169         | 160        | 340         | 160         |
| C5        | 129        | 215         | 256         | 183        | 216         | 201         | 154        | 222         | 224         |
| C6        | 15         | 112         | 473         | 3          | 113         | 484         | 164        | 215         | 221         |
| C7        | 54         | 224         | 322         | 101        | 293         | 206         | 68         | 286         | 246         |
| C8        | 131        | 268         | 201         | 93         | 284         | 223         | 44         | 244         | 312         |
| C9        | 23         | 185         | 392         | 151        | 202         | 247         | 83         | 237         | 280         |
| C10       | 153        | 204         | 243         | 78         | 296         | 226         | 178        | 203         | 219         |
| C11       | 112        | 275         | 213         | 208        | 238         | 154         | 230        | 256         | 114         |
| C12       | 186        | 124         | 290         | 118        | 209         | 273         | 152        | 207         | 241         |
| C13       | 97         | 249         | 254         | 83         | 276         | 241         | 198        | 173         | 229         |
| C14       | 285        | 220         | 95          | 124        | 257         | 219         | 90         | 235         | 275         |
| C15       | 221        | 221         | 158         | 204        | 158         | 238         | 177        | 77          | 346         |
| C16       | 83         | 177         | 340         | 126        | 236         | 238         | 122        | 180         | 298         |
| C17       | 139        | 264         | 197         | 129        | 245         | 226         | 77         | 238         | 285         |
| C18       | 307        | 171         | 122         | 149        | 225         | 226         | 227        | 217         | 156         |
| C19       | 271        | 107         | 222         | 135        | 238         | 227         | 3          | 126         | 471         |
| C20       | 26         | 273         | 301         | 79         | 308         | 213         | 178        | 241         | 181         |
| C21       | 178        | 307         | 115         | 107        | 333         | 257         | 196        | 232         | 172         |
| C22       | 205        | 229         | 166         | 184        | 268         | 148         | 142        | 241         | 217         |
| C23       | 119        | 265         | 216         | 76         | 291         | 233         | 63         | 227         | 313         |
| C24       | 187        | 244         | 169         | 172        | 208         | 220         | 225        | 136         | 239         |
| C25       | 153        | 210         | 237         | 159        | 234         | 207         | 154        | 253         | 193         |
| C26       | 189        | 172         | 239         | 123        | 242         | 235         | 192        | 277         | 131         |

| subject # | SvL sm (s) | SvL lrg (s) | SvL diff score (s) | SvL sm (s) | SvL lrg (s) | SvL diff score (s) | lvL sm (s) | lvL lrg (s) | lvL diff score (s) |
|-----------|------------|-------------|--------------------|------------|-------------|--------------------|------------|-------------|--------------------|
| C1        | 85         | 344         | -259               | 101        | 191         | -90                | 116        | 271         | -155               |
| C2        | 154        | 338         | -184               | 213        | 262         | -49                | 216        | 198         | 18                 |
| C3        | 89         | 338         | -249               | 183        | 228         | -45                | 109        | 272         | -163               |
| C4        | 171        | 165         | 6                  | 156        | 169         | -11                | 160        | 160         | 0                  |
| C5        | 129        | 256         | -127               | 183        | 201         | -18                | 154        | 224         | -70                |
| C6        | 15         | 473         | -458               | 3          | 484         | -481               | 164        | 221         | -57                |
| C7        | 54         | 322         | -268               | 101        | 206         | -105               | 68         | 246         | -178               |
| C8        | 131        | 201         | -70                | 93         | 223         | -130               | 44         | 312         | -268               |
| C9        | 23         | 392         | -369               | 151        | 247         | -95                | 83         | 280         | -197               |
| C10       | 153        | 243         | -90                | 78         | 226         | -148               | 178        | 219         | -41                |
| C11       | 112        | 213         | -101               | 208        | 154         | 54                 | 230        | 114         | 116                |
| C12       | 186        | 290         | -104               | 118        | 273         | -155               | 152        | 241         | -89                |
| C13       | 97         | 254         | -157               | 83         | 241         | -158               | 198        | 229         | -31                |
| C14       | 285        | 95          | 190                | 124        | 219         | -95                | 90         | 275         | -185               |
| C15       | 221        | 158         | 63                 | 204        | 238         | -34                | 177        | 346         | -169               |
| C16       | 83         | 340         | -257               | 126        | 238         | -112               | 122        | 298         | -176               |
| C17       | 139        | 197         | -58                | 129        | 226         | -97                | 77         | 285         | -208               |
| C18       | 307        | 122         | 185                | 149        | 226         | -77                | 227        | 156         | 71                 |
| C19       | 271        | 222         | 49                 | 135        | 227         | -92                | 3          | 471         | -468               |
| C20       | 26         | 301         | -275               | 79         | 213         | -134               | 178        | 181         | -3                 |
| C21       | 178        | 115         | 63                 | 107        | 257         | -150               | 196        | 172         | 24                 |
| C22       | 205        | 166         | 39                 | 184        | 148         | 36                 | 142        | 217         | -75                |
| C23       | 119        | 216         | -97                | 76         | 233         | -157               | 63         | 313         | -250               |
| C24       | 187        | 169         | 18                 | 172        | 220         | -48                | 225        | 239         | -14                |
| C25       | 153        | 237         | -84                | 159        | 207         | -48                | 154        | 193         | -39                |
| C26       | 189        | 239         | -50                | 123        | 235         | -112               | 192        | 131         | 61                 |

SvL sm = total time w/ smaller male

SvL sm = total time w/ smaller male “S”

lvL sm = total time w/ smaller male (the intermediate sized “I” male)

SvL mid = total time in neutral zone (i.e. central area of test arena)

SvL mid = total time in neutral zone (i.e. central area of test arena)

lvL mid = total time in neutral zone (i.e. central area of test arena)

SvL lrg = total time w/ larger male (in this case, the intermediate sized “I” male)

SvL lrg = total time w/ larger male “L”

lvL lrg = total time w/ larger male “L”

## Raw data: Control (C) females from Expt. III cont.

| subject # | Svl sm (s) | Svl lrg (s) | SvL sm (s) | SvL lrg (s) | IvL sm (s) | IvL lrg (s) | total time (s) |
|-----------|------------|-------------|------------|-------------|------------|-------------|----------------|
| C1        | 85         | 344         | 101        | 191         | 116        | 271         | 1108           |
| C2        | 154        | 338         | 213        | 262         | 216        | 198         | 1381           |
| C3        | 89         | 338         | 183        | 228         | 109        | 272         | 1219           |
| C4        | 171        | 165         | 156        | 169         | 160        | 160         | 981            |
| C5        | 129        | 256         | 183        | 201         | 154        | 224         | 1147           |
| C6        | 15         | 473         | 3          | 484         | 164        | 221         | 1360           |
| C7        | 54         | 322         | 101        | 206         | 68         | 246         | 997            |
| C8        | 131        | 201         | 93         | 223         | 44         | 312         | 1004           |
| C9        | 23         | 392         | 151        | 247         | 83         | 280         | 1176           |
| C10       | 153        | 243         | 78         | 226         | 178        | 219         | 1097           |
| C11       | 112        | 213         | 208        | 154         | 230        | 114         | 1031           |
| C12       | 186        | 290         | 118        | 273         | 152        | 241         | 1260           |
| C13       | 97         | 254         | 83         | 241         | 198        | 229         | 1102           |
| C14       | 285        | 95          | 124        | 219         | 90         | 275         | 1088           |
| C15       | 221        | 158         | 204        | 238         | 177        | 346         | 1344           |
| C16       | 83         | 340         | 126        | 238         | 122        | 298         | 1207           |
| C17       | 139        | 197         | 129        | 226         | 77         | 285         | 1053           |
| C18       | 307        | 122         | 149        | 226         | 227        | 156         | 1187           |
| C19       | 271        | 222         | 135        | 227         | 3          | 471         | 1329           |
| C20       | 26         | 301         | 79         | 213         | 178        | 181         | 978            |
| C21       | 178        | 115         | 107        | 257         | 196        | 172         | 1025           |
| C22       | 205        | 166         | 184        | 148         | 142        | 217         | 1062           |
| C23       | 119        | 216         | 76         | 233         | 63         | 313         | 1020           |
| C24       | 187        | 169         | 172        | 220         | 225        | 239         | 1212           |
| C25       | 153        | 237         | 159        | 207         | 154        | 193         | 1103           |
| C26       | 189        | 239         | 123        | 235         | 192        | 131         | 1109           |

Svl sm = total time w/ smaller male

SvL sm = total time w/ smaller male "S"

IvL sm = total time w/ smaller male (the intermediate sized "I" male)

Svl mid = total time in neutral zone (i.e. central area of test arena)

SvL mid = total time in neutral zone (i.e. central area of test arena)

IvL mid = total time in neutral zone (i.e. central area of test arena)

Svl lrg = total time w/ larger male (in this case, the intermediate sized "I" male)

SvL lrg = total time w/ larger male "L"

IvL lrg = total time w/ larger male "L"



## Raw data: High dose (HD) females from Expt. III

| subject # | Svl sm (s) | Svl mid (s) | Svl lrg (s) | SvL sm (s) | SvL mid (s) | SvL lrg (s) | IvL sm (s) | IvL mid (s) | IvL lrg (s) |
|-----------|------------|-------------|-------------|------------|-------------|-------------|------------|-------------|-------------|
| HD1       | 67         | 73          | 460         | 104        | 98          | 398         | 131        | 195         | 274         |
| HD2       | 141        | 147         | 312         | 158        | 244         | 196         | 194        | 280         | 114         |
| HD3       | 262        | 283         | 55          | 139        | 175         | 286         | 375        | 185         | 40          |
| HD4       | 229        | 100         | 271         | 226        | 255         | 119         | 271        | 209         | 120         |
| HD5       | 302        | 63          | 235         | 69         | 240         | 291         | 108        | 199         | 293         |
| HD6       | 59         | 136         | 405         | 206        | 291         | 103         | 221        | 313         | 66          |
| HD7       | 47         | 61          | 492         | 42         | 67          | 491         | 17         | 100         | 483         |
| HD8       | 7          | 56          | 537         | 129        | 153         | 318         | 6          | 98          | 496         |
| HD9       | 129        | 145         | 326         | 94         | 193         | 313         | 102        | 231         | 267         |
| HD10      | 207        | 189         | 204         | 103        | 274         | 223         | 24         | 108         | 466         |
| HD11      | 535        | 35          | 30          | 33         | 35          | 532         | 424        | 52          | 124         |
| HD12      | 122        | 208         | 270         | 170        | 316         | 114         | 161        | 323         | 116         |
| HD13      | 117        | 260         | 223         | 142        | 292         | 156         | 21         | 277         | 302         |
| HD14      | 123        | 241         | 236         | 125        | 250         | 225         | 129        | 162         | 309         |
| HD15      | 328        | 48          | 224         | 365        | 30          | 205         | 249        | 78          | 273         |
| HD16      | 270        | 248         | 82          | 134        | 377         | 243         | 333        | 234         | 33          |
| HD17      | 502        | 84          | 14          | 3          | 90          | 507         | 379        | 199         | 22          |
| HD18      | 94         | 239         | 267         | 49         | 113         | 438         | 120        | 277         | 203         |
| HD19      | 205        | 299         | 96          | 192        | 104         | 304         | 146        | 116         | 338         |
| HD20      | 130        | 227         | 243         | 162        | 211         | 227         | 149        | 233         | 218         |

Svl sm = total time w/ smaller male

SvL sm = total time w/ smaller male "S"

IvL sm = total time w/ smaller male (the intermediate sized "I" male)

Svl mid = total time in neutral zone (i.e. central area of test arena)

SvL mid = total time in neutral zone (i.e. central area of test arena)

IvL mid = total time in neutral zone (i.e. central area of test arena)

Svl lrg = total time w/ larger male (in this case, the intermediate sized "I" male)

SvL lrg = total time w/ larger male "L"

IvL lrg = total time w/ larger male "L"

## Raw data: High dose (HD) females from Expt. III cont.

| subject # | SvI sm (s) | SvI lrg (s) | SvI diff score (s) | SvL sm (s) | SvL lrg (s) | SvL diff score (s) | IvL sm (s) | IvL lrg (s) | IvL diff score (s) |
|-----------|------------|-------------|--------------------|------------|-------------|--------------------|------------|-------------|--------------------|
| HD1       | 67         | 460         | -413               | 104        | 398         | -294               | 131        | 274         | -143               |
| HD2       | 141        | 312         | -171               | 158        | 196         | -38                | 194        | 114         | 80                 |
| HD3       | 262        | 55          | 207                | 139        | 286         | -147               | 375        | 40          | 335                |
| HD4       | 229        | 271         | -42                | 226        | 119         | 107                | 271        | 120         | -164               |
| HD5       | 302        | 235         | 67                 | 69         | 291         | -222               | 108        | 293         | -185               |
| HD6       | 59         | 405         | -346               | 206        | 103         | 103                | 221        | 66          | 155                |
| HD7       | 47         | 492         | -445               | 42         | 491         | -449               | 17         | 483         | -466               |
| HD8       | 7          | 537         | -530               | 129        | 318         | -189               | 6          | 496         | -490               |
| HD9       | 129        | 326         | -197               | 94         | 313         | -219               | 102        | 267         | -165               |
| HD10      | 207        | 204         | 3                  | 103        | 223         | -120               | 24         | 466         | -442               |
| HD11      | 535        | 30          | 505                | 33         | 532         | -490               | 424        | 124         | 300                |
| HD12      | 122        | 270         | -148               | 170        | 114         | 56                 | 161        | 116         | 45                 |
| HD13      | 117        | 223         | -106               | 142        | 156         | -16                | 21         | 302         | -281               |
| HD14      | 123        | 236         | -113               | 125        | 225         | -100               | 129        | 309         | -180               |
| HD15      | 328        | 224         | 104                | 365        | 205         | 160                | 249        | 273         | -24                |
| HD16      | 270        | 82          | 188                | 134        | 243         | -109               | 333        | 33          | 300                |
| HD17      | 502        | 14          | 488                | 3          | 507         | -504               | 379        | 22          | 357                |
| HD18      | 94         | 267         | -173               | 49         | 438         | -389               | 120        | 203         | -83                |
| HD19      | 205        | 96          | 109                | 192        | 304         | -112               | 146        | 338         | -192               |
| HD20      | 130        | 243         | -113               | 162        | 227         | -65                | 149        | 218         | -69                |

SvI sm = total time w/ smaller male

SvL sm = total time w/ smaller male "S"

IvL sm = total time w/ smaller male (the intermediate sized "I" male)

SvI mid = total time in neutral zone (i.e. central area of test arena)

SvL mid = total time in neutral zone (i.e. central area of test arena)

IvL mid = total time in neutral zone (i.e. central area of test arena)

SvI lrg = total time w/ larger male (in this case, the intermediate sized "I" male)

SvL lrg = total time w/ larger male "L"

IvL lrg = total time w/ larger male "L"

## Raw data: High dose (HD) females from Expt. III cont.

| subject # | Svl sm (s) | Svl lrg (s) | SvL sm (s) | SvL lrg (s) | IvL sm (s) | IvL lrg (s) | total time (s) |
|-----------|------------|-------------|------------|-------------|------------|-------------|----------------|
| HD1       | 67         | 460         | 104        | 398         | 131        | 274         | 1434           |
| HD2       | 141        | 312         | 158        | 196         | 194        | 114         | 1115           |
| HD3       | 262        | 55          | 139        | 286         | 375        | 40          | 1157           |
| HD4       | 229        | 271         | 226        | 119         | 271        | 120         | 1236           |
| HD5       | 302        | 235         | 69         | 291         | 108        | 293         | 1298           |
| HD6       | 59         | 405         | 206        | 103         | 221        | 66          | 1060           |
| HD7       | 47         | 492         | 42         | 491         | 17         | 483         | 1572           |
| HD8       | 7          | 537         | 129        | 318         | 6          | 496         | 1493           |
| HD9       | 129        | 326         | 94         | 313         | 102        | 267         | 1231           |
| HD10      | 207        | 204         | 103        | 223         | 24         | 466         | 1227           |
| HD11      | 535        | 30          | 33         | 532         | 424        | 124         | 1678           |
| HD12      | 122        | 270         | 170        | 114         | 161        | 116         | 953            |
| HD13      | 117        | 223         | 142        | 156         | 21         | 302         | 961            |
| HD14      | 123        | 236         | 125        | 225         | 129        | 309         | 1147           |
| HD15      | 328        | 224         | 365        | 205         | 249        | 273         | 1644           |
| HD16      | 270        | 82          | 134        | 243         | 333        | 33          | 1095           |
| HD17      | 502        | 14          | 3          | 507         | 379        | 22          | 1427           |
| HD18      | 94         | 267         | 49         | 438         | 120        | 203         | 1171           |
| HD19      | 205        | 96          | 192        | 304         | 146        | 338         | 1281           |
| HD20      | 130        | 243         | 162        | 227         | 149        | 218         | 1129           |

Svl sm = total time w/ smaller male

SvL sm = total time w/ smaller male "S"

IvL sm = total time w/ smaller male (the intermediate sized "I" male)

Svl mid = total time in neutral zone (i.e. central area of test arena)

SvL mid = total time in neutral zone (i.e. central area of test arena)

IvL mid = total time in neutral zone (i.e. central area of test arena)

Svl lrg = total time w/ larger male (in this case, the intermediate sized "I" male)

SvL lrg = total time w/ larger male "L"

IvL lrg = total time w/ larger male "L"

## Raw data: Low dose (LD) females from Expt. III

| subject # | SvI sm (s) | SvI mid (s) | SvI lrg (s) | SvL sm (s) | SvL mid (s) | SvL lrg (s) | IvL sm (s) | IvL mid (s) | IvL lrg (s) |
|-----------|------------|-------------|-------------|------------|-------------|-------------|------------|-------------|-------------|
| LD1       | 28         | 64          | 508         | 390        | 202         | 8           | 10         | 116         | 474         |
| LD2       | 322        | 156         | 122         | 62         | 332         | 206         | 118        | 261         | 281         |
| LD3       | 235        | 252         | 113         | 36         | 582         | 32          | 146        | 372         | 82          |
| LD4       | 203        | 284         | 113         | 115        | 431         | 50          | 30         | 336         | 234         |
| LD5       | 96         | 371         | 133         | 253        | 241         | 106         | 111        | 428         | 61          |
| LD6       | 73         | 170         | 357         | 426        | 147         | 27          | 153        | 252         | 195         |
| LD7       | 211        | 190         | 199         | 500        | 100         | 0           | 53         | 378         | 69          |
| LD8       | 29         | 129         | 442         | 19         | 349         | 252         | 7          | 132         | 461         |
| LD9       | 90         | 177         | 333         | 108        | 308         | 184         | 78         | 247         | 275         |
| LD10      | 520        | 67          | 13          | 6          | 108         | 486         | 451        | 145         | 4           |
| LD11      | 187        | 252         | 161         | 61         | 258         | 281         | 108        | 276         | 216         |
| LD12      | 175        | 194         | 281         | 142        | 411         | 45          | 110        | 396         | 94          |
| LD13      | 368        | 197         | 35          | 0          | 345         | 255         | 256        | 279         | 66          |
| LD14      | 237        | 334         | 29          | 94         | 325         | 181         | 170        | 399         | 38          |
| LD15      | 442        | 121         | 37          | 135        | 346         | 119         | 331        | 232         | 37          |
| LD16      | 84         | 327         | 189         | 42         | 140         | 418         | 291        | 520         | 96          |
| LD17      | 17         | 196         | 387         | 56         | 207         | 337         | 38         | 374         | 188         |
| LD18      | 50         | 281         | 269         | 80         | 196         | 324         | 119        | 368         | 113         |

SvI sm = total time w/ smaller male

SvL sm = total time w/ smaller male "S"

IvL sm = total time w/ smaller male (the intermediate sized "I" male)

SvI mid = total time in neutral zone (i.e. central area of test arena)

SvL mid = total time in neutral zone (i.e. central area of test arena)

IvL mid = total time in neutral zone (i.e. central area of test arena)

SvI lrg = total time w/ larger male (in this case, the intermediate sized "I" male)

SvL lrg = total time w/ larger male "L"

IvL lrg = total time w/ larger male "L"

## Raw data: Low dose (LD) females from Expt. III cont.

| subject # | SvI sm (s) | SvI lrg (s) | SvI diff score (s) | SvL sm (s) | SvL lrg (s) | SvL diff score (s) | IvL sm (s) | IvL lrg (s) | IvL diff score (s) |
|-----------|------------|-------------|--------------------|------------|-------------|--------------------|------------|-------------|--------------------|
| LD1       | 28         | 508         | -480               | 390        | 8           | 382                | 10         | 474         | -464               |
| LD2       | 322        | 122         | 200                | 62         | 206         | -144               | 118        | 281         | -163               |
| LD3       | 235        | 113         | 122                | 36         | 32          | 4                  | 146        | 82          | 64                 |
| LD4       | 203        | 113         | 90                 | 115        | 50          | 65                 | 30         | 234         | -204               |
| LD5       | 96         | 133         | -37                | 253        | 106         | 147                | 111        | 61          | 50                 |
| LD6       | 73         | 357         | -284               | 426        | 27          | 399                | 153        | 195         | -42                |
| LD7       | 211        | 199         | 12                 | 500        | 0           | 500                | 53         | 69          | -16                |
| LD8       | 29         | 442         | -413               | 19         | 252         | -233               | 7          | 461         | -454               |
| LD9       | 90         | 333         | -243               | 108        | 184         | -76                | 78         | 275         | -197               |
| LD10      | 520        | 13          | 507                | 6          | 486         | -480               | 451        | 4           | 447                |
| LD11      | 187        | 161         | 26                 | 61         | 281         | -220               | 108        | 216         | -108               |
| LD12      | 175        | 281         | -106               | 142        | 45          | 97                 | 110        | 94          | 16                 |
| LD13      | 368        | 35          | 333                | 0          | 255         | -255               | 256        | 66          | 190                |
| LD14      | 237        | 29          | 208                | 94         | 181         | -87                | 170        | 38          | 132                |
| LD15      | 442        | 37          | 405                | 135        | 119         | 16                 | 331        | 37          | 294                |
| LD16      | 84         | 189         | -105               | 42         | 418         | -376               | 291        | 96          | 195                |
| LD17      | 17         | 387         | -370               | 56         | 337         | -281               | 38         | 188         | -150               |
| LD18      | 50         | 269         | -219               | 80         | 324         | -244               | 119        | 113         | 6                  |

SvI sm = total time w/ smaller male

SvL sm = total time w/ smaller male "S"

IvL sm = total time w/ smaller male (the intermediate sized "I" male)

SvI mid = total time in neutral zone (i.e. central area of test arena)

SvL mid = total time in neutral zone (i.e. central area of test arena)

IvL mid = total time in neutral zone (i.e. central area of test arena)

SvI lrg = total time w/ larger male (in this case, the intermediate sized "I" male)

SvL lrg = total time w/ larger male "L"

IvL lrg = total time w/ larger male "L"

## Raw data: Low dose (LD) females from Expt. III cont.

| subject # | SvI sm (s) | SvI lrg (s) | SvL sm (s) | SvL lrg (s) | IvL sm (s) | IvL lrg (s) | total time (s) |
|-----------|------------|-------------|------------|-------------|------------|-------------|----------------|
| LD1       | 28         | 508         | 390        | 8           | 10         | 474         | 1418           |
| LD2       | 322        | 122         | 62         | 206         | 118        | 281         | 1111           |
| LD3       | 235        | 113         | 36         | 32          | 146        | 82          | 644            |
| LD4       | 203        | 113         | 115        | 50          | 30         | 234         | 745            |
| LD5       | 96         | 133         | 253        | 106         | 111        | 61          | 760            |
| LD6       | 73         | 357         | 426        | 27          | 153        | 195         | 1231           |
| LD7       | 211        | 199         | 500        | 0           | 53         | 69          | 1032           |
| LD8       | 29         | 442         | 19         | 252         | 7          | 461         | 1210           |
| LD9       | 90         | 333         | 108        | 184         | 78         | 275         | 1068           |
| LD10      | 520        | 13          | 6          | 486         | 451        | 4           | 1480           |
| LD11      | 187        | 161         | 61         | 281         | 108        | 216         | 1014           |
| LD12      | 175        | 281         | 142        | 45          | 110        | 94          | 847            |
| LD13      | 368        | 35          | 0          | 255         | 256        | 66          | 980            |
| LD14      | 237        | 29          | 94         | 181         | 170        | 38          | 749            |
| LD15      | 442        | 37          | 135        | 119         | 331        | 37          | 1101           |
| LD16      | 84         | 189         | 42         | 418         | 291        | 96          | 1120           |
| LD17      | 17         | 387         | 56         | 337         | 38         | 188         | 1023           |
| LD18      | 50         | 269         | 80         | 324         | 119        | 113         | 955            |

SvI sm = total time w/ smaller male

SvL sm = total time w/ smaller male "S"

IvL sm = total time w/ smaller male (the intermediate sized "I" male)

SvI mid = total time in neutral zone (i.e. central area of test arena)

SvL mid = total time in neutral zone (i.e. central area of test arena)

IvL mid = total time in neutral zone (i.e. central area of test arena)

SvI lrg = total time w/ larger male (in this case, the intermediate sized "I" male)

SvL lrg = total time w/ larger male "L"

IvL lrg = total time w/ larger male "L"

## Raw data: Mirror Test (Expt. IV)

| Fish Test Group and # | Control time in mirror zone (s) | Fish Test Group and # | HD time in mirror zone (s) | Fish Test Group and # | LD time in mirror zone (s) |
|-----------------------|---------------------------------|-----------------------|----------------------------|-----------------------|----------------------------|
| C1                    | 522                             | HD1                   | 302                        | LD1                   | 111                        |
| C1                    | 418                             | HD2                   | 115                        | LD2                   | 183                        |
| C3                    | 505                             | HD3                   | 233                        | LD3                   | 284                        |
| C4                    | 215                             | HD4                   | 87                         | LD4                   | 66                         |
| C5                    | 415                             | HD5                   | 187                        | LD5                   | 94                         |
| C6                    | 511                             | HD6                   | 345                        | LD6                   | 294                        |
| C7                    | 401                             | HD7                   | 228                        | LD7                   | 311                        |
| C8                    | 322                             | HD8                   | 328                        | LD8                   | 102                        |
| C9                    | 534                             | HD9                   | 55                         | LD9                   | 85                         |
| C10                   | 288                             | HD10                  | 301                        | LD10                  | 22                         |
| C11                   | 384                             | HD11                  | 212                        | LD11                  | 118                        |
| C12                   | 284                             | HD12                  | 87                         | LD12                  | 116                        |
| C13                   | 535                             | HD13                  | 411                        | LD13                  | 35                         |
| C14                   | 182                             | HD14                  | 290                        | LD14                  | 85                         |
| C15                   | 382                             | HD15                  | 154                        | LD15                  | 44                         |
| C16                   | 463                             | HD16                  | 31                         | LD16                  | 11                         |
| C17                   | 437                             | HD17                  | 184                        | LD17                  | 312                        |
| C18                   | 527                             | HD18                  | 224                        | LD18                  | 75                         |
| C19                   | 487                             | HD19                  | 42                         | LD19                  | 75                         |
| C20                   | 302                             | HD20                  | 177                        | LD20                  | 108                        |

C =control; HD = High Dose; LD = Low Dose

# Raw data: Novel Arena Test, Bottom Zone Time (BZT) for all females from Expt. I & III

BZT F Cont = Bottom zone time for control female

BZT F HD = Bottom zone time for high dose female

BZT F LD = Bottom zone time for low dose female

C1 Expt I = Control female 1 from Experiment I

C1 Expt III = Control female 1 from Experiment III

HD1 Expt I = High dose female 1 from Experiment I

HD1 Expt III = High dose female 1 from Experiment III

LD1 Expt I = Low dose female 1 from Experiment I

LD1 Expt III = Low dose female 1 from Experiment III

| FemaleCont   | BZT F Cont (s) | FemaleHD      | BZT F HD (s) | FemaleLD      | BZT F LD (s) |
|--------------|----------------|---------------|--------------|---------------|--------------|
| C1 Expt I    | 128            | HD1 Expt I    | 375          | LD1 Expt I    | 600          |
| C1 Expt I    | 265            | HD1 Expt I    | 311          | LD1 Expt I    | 512          |
| C3 Expt I    | 411            | HD3 Expt I    | 521          | LD3 Expt I    | 311          |
| C4 Expt I    | 325            | HD4 Expt I    | 600          | LD4 Expt I    | 312          |
| C5 Expt I    | 416            | HD5 Expt I    | 552          | LD5 Expt I    | 528          |
| C6 Expt I    | 122            | HD6 Expt I    | 288          | LD6 Expt I    | 401          |
| C7 Expt I    | 200            | HD7 Expt I    | 412          | LD7 Expt I    | 215          |
| C8 Expt I    | 86             | HD8 Expt I    | 324          | LD8 Expt I    | 415          |
| C9 Expt I    | 186            | HD9 Expt I    | 300          | LD9 Expt I    | 435          |
| C10 Expt I   | 172            | HD10 Expt I   | 261          | LD10 Expt I   | 522          |
| C11 Expt I   | 302            | HD11 Expt I   | 523          | LD11 Expt I   | 417          |
| C12 Expt I   | 522            | HD12 Expt I   | 418          | LD12 Expt I   | 505          |
| C13 Expt I   | 55             | HD13 Expt I   | 496          | LD13 Expt I   | 316          |
| C14 Expt I   | 118            | HD14 Expt I   | 413          | LD14 Expt I   | 228          |
| C15 Expt I   | 202            | HD15 Expt I   | 311          | LD15 Expt I   | 600          |
| C16 Expt I   | 155            | HD16 Expt I   | 199          | LD16 Expt I   | 517          |
| C17 Expt I   | 222            | HD17 Expt I   | 276          | LD17 Expt I   | 489          |
| C18 Expt I   | 324            | HD18 Expt I   | 399          | LD18 Expt I   | 429          |
| C19 Expt I   | 245            | HD19 Expt I   | 414          | LD19 Expt I   | 399          |
| C20 Expt I   | 199            | HD20 Expt I   | 418          | LD20 Expt I   | 560          |
| C1 Expt III  | 129            | HD1 Expt III  | 328          | LD1 Expt III  | 420          |
| C1 Expt III  | 130            | HD2 Expt III  | 382          | LD2 Expt III  | 369          |
| C3 Expt III  | 211            | HD3 Expt III  | 422          | LD3 Expt III  | 236          |
| C4 Expt III  | 212            | HD4 Expt III  | 302          | LD4 Expt III  | 526          |
| C5 Expt III  | 305            | HD5 Expt III  | 333          | LD5 Expt III  | 600          |
| C6 Expt III  | 322            | HD6 Expt III  | 393          | LD6 Expt III  | 399          |
| C7 Expt III  | 102            | HD7 Expt III  | 453          | LD7 Expt III  | 501          |
| C8 Expt III  | 98             | HD8 Expt III  | 335          | LD8 Expt III  | 521          |
| C9 Expt III  | 128            | HD9 Expt III  | 527          | LD9 Expt III  | 421          |
| C10 Expt III | 234            | HD10 Expt III | 337          | LD10 Expt III | 501          |
| C11 Expt III | 235            | HD11 Expt III | 281          | LD11 Expt III | 422          |
| C12 Expt III | 117            | HD12 Expt III | 392          | LD12 Expt III | 588          |
| C13 Expt III | 317            | HD13 Expt III | 284          | LD13 Expt III | 512          |
| C14 Expt III | 404            | HD14 Expt III | 494          | LD14 Expt III | 534          |
| C15 Expt III | 301            | HD15 Expt III | 504          | LD15 Expt III | 218          |
| C16 Expt III | 215            | HD16 Expt III | 294          | LD16 Expt III | 412          |
| C17 Expt III | 178            | HD17 Expt III | 515          | LD17 Expt III | 519          |
| C18 Expt III | 175            | HD18 Expt III | 375          | LD18 Expt III | 591          |
| C19 Expt III | 225            | HD19 Expt III | 302          |               |              |
| C20 Expt III | 212            | HD20 Expt III | 401          |               |              |
| C21 Expt III | 112            |               |              |               |              |
| C22 Expt III | 388            |               |              |               |              |
| C23 Expt III | 263            |               |              |               |              |
| C24 Expt III | 137            |               |              |               |              |
| C25 Expt III | 133            |               |              |               |              |
| C26 Expt III | 254            |               |              |               |              |



# Raw data: Novel Arena Test, Bottom Zone Time (BZT) for all males from Expt. II & IV

BZT M Cont = Bottom zone time for control male

BZT M HD = Bottom zone time for high dose male

BZT M LD = Bottom zone time for low dose male

C1 Expt II = Control male 1 from Experiment II

C1 Expt IV = Control male 1 from Experiment IV

HD1 Expt II = High dose male 1 from Experiment II

HD1 Expt IV = High dose male 1 from Experiment IV

LD1 Expt II = Low dose male 1 from Experiment II

LD1 Expt IV = Low dose male 1 from Experiment IV

| MaleCont    | BZT M Cont (s) | MaleHD       | BZT M HD (s) | MaleLD       | BZT M LD (s) |
|-------------|----------------|--------------|--------------|--------------|--------------|
| C1 Expt II  | 111            | HD1 Expt II  | 335          | LD1 Expt II  | 435          |
| C1 Expt II  | 88             | HD2 Expt II  | 312          | LD2 Expt II  | 404          |
| C3 Expt II  | 238            | HD3 Expt II  | 395          | LD3 Expt II  | 315          |
| C4 Expt II  | 128            | HD4 Expt II  | 422          | LD4 Expt II  | 419          |
| C5 Expt II  | 84             | HD5 Expt II  | 287          | LD5 Expt II  | 600          |
| C6 Expt II  | 477            | HD6 Expt II  | 446          | LD6 Expt II  | 519          |
| C7 Expt II  | 311            | HD7 Expt II  | 398          | LD7 Expt II  | 328          |
| C8 Expt II  | 102            | HD8 Expt II  | 400          | LD8 Expt II  | 338          |
| C9 Expt II  | 43             | HD9 Expt II  | 515          | LD9 Expt II  | 395          |
| C10 Expt II | 54             | HD10 Expt II | 413          | LD10 Expt II | 414          |
| C11 Expt II | 157            | HD11 Expt II | 315          | LD11 Expt II | 512          |
| C12 Expt II | 137            | HD12 Expt II | 266          | LD12 Expt II | 199          |
| C13 Expt II | 227            | HD13 Expt II | 588          | LD13 Expt II | 329          |
| C14 Expt II | 115            | HD14 Expt II | 388          | LD14 Expt II | 416          |
| C15 Expt II | 212            | HD15 Expt II | 420          | LD15 Expt II | 563          |
| C16 Expt II | 95             | HD16 Expt II | 460          | LD16 Expt II | 423          |
| C17 Expt II | 85             | HD17 Expt II | 333          | LD17 Expt II | 567          |
| C18 Expt II | 124            | HD18 Expt II | 311          | LD18 Expt II | 127          |
| C19 Expt II | 94             | HD19 Expt II | 303          | LD19 Expt II | 311          |
| C20 Expt II | 294            | HD20 Expt II | 287          | LD20 Expt II | 487          |
| C1 Expt IV  | 69             | HD1 Expt IV  | 226          | LD1 Expt IV  | 525          |
| C1 Expt IV  | 144            | HD2 Expt IV  | 336          | LD2 Expt IV  | 311          |
| C3 Expt IV  | 213            | HD3 Expt IV  | 186          | LD3 Expt IV  | 416          |
| C4 Expt IV  | 218            | HD4 Expt IV  | 206          | LD4 Expt IV  | 502          |
| C5 Expt IV  | 119            | HD5 Expt IV  | 416          | LD5 Expt IV  | 422          |
| C6 Expt IV  | 98             | HD6 Expt IV  | 332          | LD6 Expt IV  | 494          |
| C7 Expt IV  | 227            | HD7 Expt IV  | 311          | LD7 Expt IV  | 294          |
| C8 Expt IV  | 57             | HD8 Expt IV  | 276          | LD8 Expt IV  | 311          |
| C9 Expt IV  | 301            | HD9 Expt IV  | 384          | LD9 Expt IV  | 500          |
| C10 Expt IV | 333            | HD10 Expt IV | 288          | LD10 Expt IV | 467          |
| C11 Expt IV | 87             | HD11 Expt IV | 322          | LD11 Expt IV | 577          |
| C12 Expt IV | 184            | HD12 Expt IV | 284          | LD12 Expt IV | 387          |
| C13 Expt IV | 64             | HD13 Expt IV | 339          | LD13 Expt IV | 412          |
| C14 Expt IV | 153            | HD14 Expt IV | 207          | LD14 Expt IV | 287          |
| C15 Expt IV | 196            | HD15 Expt IV | 522          | LD15 Expt IV | 397          |
| C16 Expt IV | 236            | HD16 Expt IV | 480          | LD16 Expt IV | 527          |
| C17 Expt IV | 106            | HD17 Expt IV | 301          | LD17 Expt IV | 453          |
| C18 Expt IV | 265            | HD18 Expt IV | 255          | LD18 Expt IV | 543          |
| C19 Expt IV | 243            | HD19 Expt IV | 225          | LD19 Expt IV | 123          |
| C20 Expt IV | 210            | HD20 Expt IV | 318          | LD20 Expt IV | 239          |

# Raw data: Novel Arena Test, Latency to enter Top Zone (LTZ) for all females from Expt. I & III

LTZ F Cont = Latency to enter Top Zone for control female

LTZ F HD = Latency to enter Top Zone for high dose female

LTZ F LD = Latency to enter Top Zone for low dose female

C1 Expt I = Control female 1 from Experiment I

C1 Expt III = Control female 1 from Experiment III

HD1 Expt I = High dose female 1 from Experiment I

HD1 Expt III = High dose female 1 from Experiment III

LD1 Expt I = Low dose female 1 from Experiment I

LD1 Expt III = Low dose female 1 from Experiment III

| FemaleCont   | LTZ F Cont (s) | FemaleHD      | LTZ F HD (s) | FemaleLD      | LTZ F LD (s) |
|--------------|----------------|---------------|--------------|---------------|--------------|
| C1 Expt I    | 35             | HD1 Expt I    | 215          | LD1 Expt I    | 600          |
| C1 Expt I    | 77             | HD1 Expt I    | 202          | LD1 Expt I    | 514          |
| C3 Expt I    | 228            | HD3 Expt I    | 535          | LD3 Expt I    | 160          |
| C4 Expt I    | 107            | HD4 Expt I    | 600          | LD4 Expt I    | 183          |
| C5 Expt I    | 243            | HD5 Expt I    | 600          | LD5 Expt I    | 531          |
| C6 Expt I    | 38             | HD6 Expt I    | 118          | LD6 Expt I    | 410          |
| C7 Expt I    | 51             | HD7 Expt I    | 235          | LD7 Expt I    | 188          |
| C8 Expt I    | 35             | HD8 Expt I    | 205          | LD8 Expt I    | 422          |
| C9 Expt I    | 59             | HD9 Expt I    | 200          | LD9 Expt I    | 485          |
| C10 Expt I   | 83             | HD10 Expt I   | 155          | LD10 Expt I   | 555          |
| C11 Expt I   | 102            | HD11 Expt I   | 536          | LD11 Expt I   | 423          |
| C12 Expt I   | 222            | HD12 Expt I   | 301          | LD12 Expt I   | 518          |
| C13 Expt I   | 32             | HD13 Expt I   | 534          | LD13 Expt I   | 187          |
| C14 Expt I   | 44             | HD14 Expt I   | 216          | LD14 Expt I   | 198          |
| C15 Expt I   | 71             | HD15 Expt I   | 126          | LD15 Expt I   | 600          |
| C16 Expt I   | 83             | HD16 Expt I   | 145          | LD16 Expt I   | 522          |
| C17 Expt I   | 81             | HD17 Expt I   | 199          | LD17 Expt I   | 266          |
| C18 Expt I   | 121            | HD18 Expt I   | 215          | LD18 Expt I   | 226          |
| C19 Expt I   | 112            | HD19 Expt I   | 315          | LD19 Expt I   | 221          |
| C20 Expt I   | 114            | HD20 Expt I   | 404          | LD20 Expt I   | 412          |
| C1 Expt III  | 62             | HD1 Expt III  | 212          | LD1 Expt III  | 303          |
| C1 Expt III  | 34             | HD2 Expt III  | 188          | LD2 Expt III  | 118          |
| C3 Expt III  | 101            | HD3 Expt III  | 511          | LD3 Expt III  | 108          |
| C4 Expt III  | 115            | HD4 Expt III  | 217          | LD4 Expt III  | 315          |
| C5 Expt III  | 220            | HD5 Expt III  | 198          | LD5 Expt III  | 600          |
| C6 Expt III  | 125            | HD6 Expt III  | 194          | LD6 Expt III  | 167          |
| C7 Expt III  | 91             | HD7 Expt III  | 388          | LD7 Expt III  | 525          |
| C8 Expt III  | 30             | HD8 Expt III  | 210          | LD8 Expt III  | 535          |
| C9 Expt III  | 75             | HD9 Expt III  | 575          | LD9 Expt III  | 322          |
| C10 Expt III | 101            | HD10 Expt III | 122          | LD10 Expt III | 530          |
| C11 Expt III | 94             | HD11 Expt III | 128          | LD11 Expt III | 412          |
| C12 Expt III | 110            | HD12 Expt III | 158          | LD12 Expt III | 600          |
| C13 Expt III | 90             | HD13 Expt III | 215          | LD13 Expt III | 550          |
| C14 Expt III | 261            | HD14 Expt III | 515          | LD14 Expt III | 580          |
| C15 Expt III | 172            | HD15 Expt III | 519          | LD15 Expt III | 118          |
| C16 Expt III | 99             | HD16 Expt III | 113          | LD16 Expt III | 216          |
| C17 Expt III | 78             | HD17 Expt III | 527          | LD17 Expt III | 300          |
| C18 Expt III | 47             | HD18 Expt III | 180          | LD18 Expt III | 413          |
| C19 Expt III | 127            | HD19 Expt III | 190          |               |              |
| C20 Expt III | 107            | HD20 Expt III | 433          |               |              |
| C21 Expt III | 29             |               |              |               |              |
| C22 Expt III | 199            |               |              |               |              |
| C23 Expt III | 129            |               |              |               |              |
| C24 Expt III | 45             |               |              |               |              |
| C25 Expt III | 23             |               |              |               |              |
| C26 Expt III | 65             |               |              |               |              |

# Raw data: Novel Arena Test, Latency to enter Top Zone (LTZ) for all males from Expt. II & IV

LTZ M Cont = Latency to enter Top Zone for control male

LTZ M HD = Latency to enter Top Zone for high dose male

LTZ M LD = Latency to enter Top Zone for low dose male

C1 Expt II = Control male 1 from Experiment II

C1 Expt IV = Control male 1 from Experiment IV

HD1 Expt II = High dose male 1 from Experiment II

HD1 Expt IV = High dose male 1 from Experiment IV

LD1 Expt II = Low dose male 1 from Experiment II

LD1 Expt IV = Low dose male 1 from Experiment IV

| MaleCont    | LTZ M Cont (s) | MaleHD        | LTZ M HD (s) | MaleLD        | LTZ M LD (s) |
|-------------|----------------|---------------|--------------|---------------|--------------|
| C1 Expt II  | 24             | HD1 Expt I    | 150          | LD1 Expt I    | 305          |
| C1 Expt II  | 18             | HD1 Expt I    | 185          | LD1 Expt I    | 183          |
| C3 Expt II  | 85             | HD3 Expt I    | 111          | LD3 Expt I    | 118          |
| C4 Expt II  | 32             | HD4 Expt I    | 219          | LD4 Expt I    | 229          |
| C5 Expt II  | 11             | HD5 Expt I    | 78           | LD5 Expt I    | 600          |
| C6 Expt II  | 433            | HD6 Expt I    | 226          | LD6 Expt I    | 303          |
| C7 Expt II  | 213            | HD7 Expt I    | 107          | LD7 Expt I    | 108          |
| C8 Expt II  | 34             | HD8 Expt I    | 312          | LD8 Expt I    | 121          |
| C9 Expt II  | 13             | HD9 Expt I    | 316          | LD9 Expt I    | 129          |
| C10 Expt II | 19             | HD10 Expt I   | 218          | LD10 Expt I   | 244          |
| C11 Expt II | 57             | HD11 Expt I   | 93           | LD11 Expt I   | 402          |
| C12 Expt II | 27             | HD12 Expt I   | 49           | LD12 Expt I   | 79           |
| C13 Expt II | 77             | HD13 Expt I   | 600          | LD13 Expt I   | 100          |
| C14 Expt II | 58             | HD14 Expt I   | 108          | LD14 Expt I   | 144          |
| C15 Expt II | 108            | HD15 Expt I   | 199          | LD15 Expt I   | 565          |
| C16 Expt II | 17             | HD16 Expt I   | 339          | LD16 Expt I   | 188          |
| C17 Expt II | 35             | HD17 Expt I   | 101          | LD17 Expt I   | 298          |
| C18 Expt II | 49             | HD18 Expt I   | 105          | LD18 Expt I   | 67           |
| C19 Expt II | 29             | HD19 Expt I   | 155          | LD19 Expt I   | 101          |
| C20 Expt II | 214            | HD20 Expt I   | 134          | LD20 Expt I   | 230          |
| C1 Expt IV  | 9              | HD1 Expt III  | 89           | LD1 Expt III  | 220          |
| C1 Expt IV  | 14             | HD2 Expt III  | 174          | LD2 Expt III  | 102          |
| C3 Expt IV  | 41             | HD3 Expt III  | 72           | LD3 Expt III  | 215          |
| C4 Expt IV  | 61             | HD4 Expt III  | 92           | LD4 Expt III  | 506          |
| C5 Expt IV  | 21             | HD5 Expt III  | 311          | LD5 Expt III  | 135          |
| C6 Expt IV  | 18             | HD6 Expt III  | 115          | LD6 Expt III  | 185          |
| C7 Expt IV  | 38             | HD7 Expt III  | 141          | LD7 Expt III  | 111          |
| C8 Expt IV  | 19             | HD8 Expt III  | 103          | LD8 Expt III  | 93           |
| C9 Expt IV  | 155            | HD9 Expt III  | 119          | LD9 Expt III  | 413          |
| C10 Expt IV | 104            | HD10 Expt III | 108          | LD10 Expt III | 227          |
| C11 Expt IV | 37             | HD11 Expt III | 112          | LD11 Expt III | 600          |
| C12 Expt IV | 38             | HD12 Expt III | 99           | LD12 Expt III | 105          |
| C13 Expt IV | 15             | HD13 Expt III | 126          | LD13 Expt III | 139          |
| C14 Expt IV | 35             | HD14 Expt III | 87           | LD14 Expt III | 107          |
| C15 Expt IV | 51             | HD15 Expt III | 526          | LD15 Expt III | 84           |
| C16 Expt IV | 16             | HD16 Expt III | 260          | LD16 Expt III | 511          |
| C17 Expt IV | 39             | HD17 Expt III | 99           | LD17 Expt III | 288          |
| C18 Expt IV | 111            | HD18 Expt III | 103          | LD18 Expt III | 389          |
| C19 Expt IV | 40             | HD19 Expt III | 120          | LD19 Expt III | 72           |
| C20 Expt IV | 47             | HD20 Expt III | 152          | LD20 Expt III | 68           |
